# Supplementary figures and images for: A stable biomimetic redoxcatalyst obtained by the enzyme catalyzed amidation of iron porphyrin
Source: Royal Society of Chemistry journal article supplement (doi:10.1039/b813823k), 2008-12-18

SUPPLEMENTARY INFORMATION

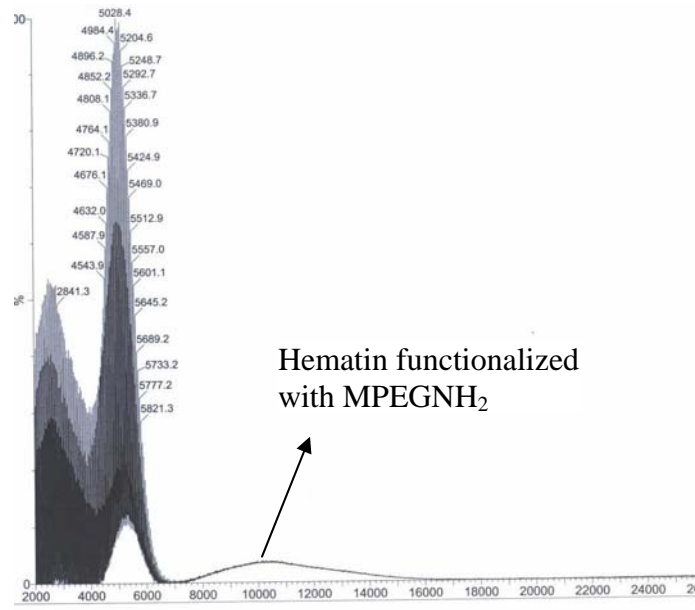

**Figure 1:** MALDI-TOF MS spectrum for the amidated hematin

Supplement: b813823k.pdf [file b813823k.pdf]
